# Supplementary material
Source: PubMed Central journal article supplement (PMC4959243)

## SUPPLEMENTARY FIGURES AND TABLE

**Supplementary Figure 1.** MST of the wgMLST data generated (Ridom SeqSphere+) for the strains sequenced in this study, showing the amount of loci differences among them. The numbers above the connected lines are loci differences. The lines are not drawn at scale.

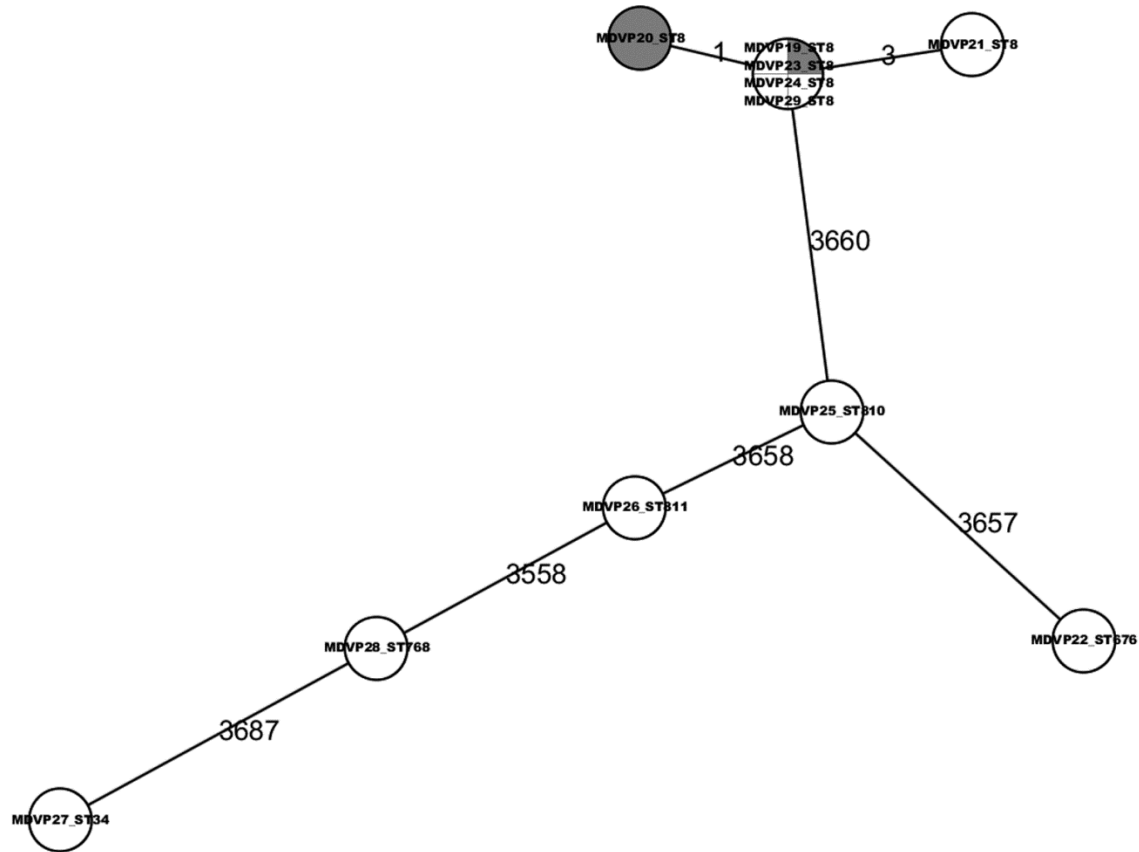

**Supplementary Figure 2.** List of genomes available at Genbank that clustered by whole genome Blast analysis ([http://www.ncbi.nlm.nih.gov/genome/genomes/691?genome\\_assembly\\_id=group167998](http://www.ncbi.nlm.nih.gov/genome/genomes/691?genome_assembly_id=group167998))

**Vibrio parahaemolyticus**

Genome group related to *Vibrio parahaemolyticus* O1:K33 str. CDC\_K4557

[Return to Vibrio parahaemolyticus](#)

|                                               |             |              |                             |                 |       |           |       |                                                                             |                        |           | Items 1 - 15 of 15 << First < |  |  |
|-----------------------------------------------|-------------|--------------|-----------------------------|-----------------|-------|-----------|-------|-----------------------------------------------------------------------------|------------------------|-----------|-------------------------------|--|--|
| Organism/Name                                 | Strain      | BioSample    | BioProject                  | Assembly        | Level | Size (Mb) | GC%   | Replicons                                                                   | WGS                    | Scaffolds | Gene                          |  |  |
| Vibrio parahaemolyticus O1:K33 str. CDC_K4557 | CDC_K4557   | SAMN02179884 | <a href="#">PRJNA212977</a> | GCA_000430425.1 | ●     | 5.13858   | 45.34 | chromosome I:NC_021848.1/CP006008.1<br>chromosome II:NC_021822.1/CP006007.1 | -                      | -         | 4672                          |  |  |
| Vibrio parahaemolyticus S049                  | S049        | SAMN02338910 | <a href="#">PRJNA224116</a> | GCA_000491195.1 | 🌀     | 5.22948   | 45.00 | -                                                                           | <a href="#">AWLM01</a> | 714       | 4824                          |  |  |
| Vibrio parahaemolyticus S036                  | S036        | SAMN02338897 | <a href="#">PRJNA224116</a> | GCA_000491455.1 | 🌀     | 5.03362   | 45.30 | -                                                                           | <a href="#">AWLZ01</a> | 498       | 4569                          |  |  |
| Vibrio parahaemolyticus S035                  | S035        | SAMN02338896 | <a href="#">PRJNA224116</a> | GCA_000491475.1 | 🌀     | 5.12037   | 45.20 | -                                                                           | <a href="#">AWMA01</a> | 543       | 4673                          |  |  |
| Vibrio parahaemolyticus S034                  | S034        | SAMN02338895 | <a href="#">PRJNA224116</a> | GCA_000491495.1 | 🌀     | 5.14806   | 45.20 | -                                                                           | <a href="#">AWMB01</a> | 460       | 4692                          |  |  |
| Vibrio parahaemolyticus S033                  | S033        | SAMN02338894 | <a href="#">PRJNA224116</a> | GCA_000491515.1 | 🌀     | 5.17183   | 45.20 | -                                                                           | <a href="#">AWMC01</a> | 477       | 4763                          |  |  |
| Vibrio parahaemolyticus S032                  | S032        | SAMN02338893 | <a href="#">PRJNA224116</a> | GCA_000491535.1 | 🌀     | 5.11799   | 45.20 | -                                                                           | <a href="#">AWMD01</a> | 767       | 4712                          |  |  |
| Vibrio parahaemolyticus S022                  | S022        | SAMN02338883 | <a href="#">PRJNA224116</a> | GCA_000491735.1 | 🌀     | 5.22298   | 45.20 | -                                                                           | <a href="#">AWMN01</a> | 444       | 4809                          |  |  |
| Vibrio parahaemolyticus VIP4-0219             | VIP4-0219   | SAMN02471131 | <a href="#">PRJNA224116</a> | GCA_000500525.1 | 🌀     | 5.17815   | 45.20 | -                                                                           | <a href="#">AXNQ01</a> | 79        | 4694                          |  |  |
| Vibrio parahaemolyticus                       | CFSAN012493 | SAMN02741401 | <a href="#">PRJNA224116</a> | GCA_000707265.1 | 🌀     | 5.05257   | 45.20 | -                                                                           | <a href="#">JNUJ01</a> | 286       | 4578                          |  |  |
| Vibrio parahaemolyticus                       | CFSAN012494 | SAMN02741402 | <a href="#">PRJNA245882</a> | GCA_000707345.1 | 🌀     | 5.01187   | 45.20 | -                                                                           | <a href="#">JNUJ01</a> | 245       | 4597                          |  |  |
| Vibrio parahaemolyticus                       | CFSAN012491 | SAMN02741399 | <a href="#">PRJNA224116</a> | GCA_000707645.1 | 🌀     | 5.00969   | 45.10 | -                                                                           | <a href="#">JNUG01</a> | 378       | 4535                          |  |  |
| Vibrio parahaemolyticus                       | CFSAN012492 | SAMN02741400 | <a href="#">PRJNA224116</a> | GCA_000707665.1 | 🌀     | 5.09548   | 45.10 | -                                                                           | <a href="#">JNUH01</a> | 205       | 4580                          |  |  |
| Vibrio parahaemolyticus                       | CFSAN007452 | SAMN02741388 | <a href="#">PRJNA224116</a> | GCA_000707785.1 | 🌀     | 5.03474   | 45.20 | -                                                                           | <a href="#">JNTJ01</a> | 304       | 4569                          |  |  |
| Vibrio parahaemolyticus                       | CFSAN007453 | SAMN02741389 | <a href="#">PRJNA224116</a> | GCA_000707825.1 | 🌀     | 5.06886   | 45.10 | -                                                                           | <a href="#">JNTK01</a> | 186       | 4575                          |  |  |

Items 1 - 15 of 15 << First <

**Supplementary Figure 3.** MST showing the differences between members of the CC8 in our study (6) and the ones available at GenBank (9 genomes – see figure supplementary 3) determined by wgMLST analysis. A) MST showing Loci differences among the strains (total loci 3605). B) MST of the SNPs differences within the different loci (19008 total SNPs). The numbers above the connected lines are loci (A) and SNPs (B) differences, respectively. The lines are not drawn at scale.

A)

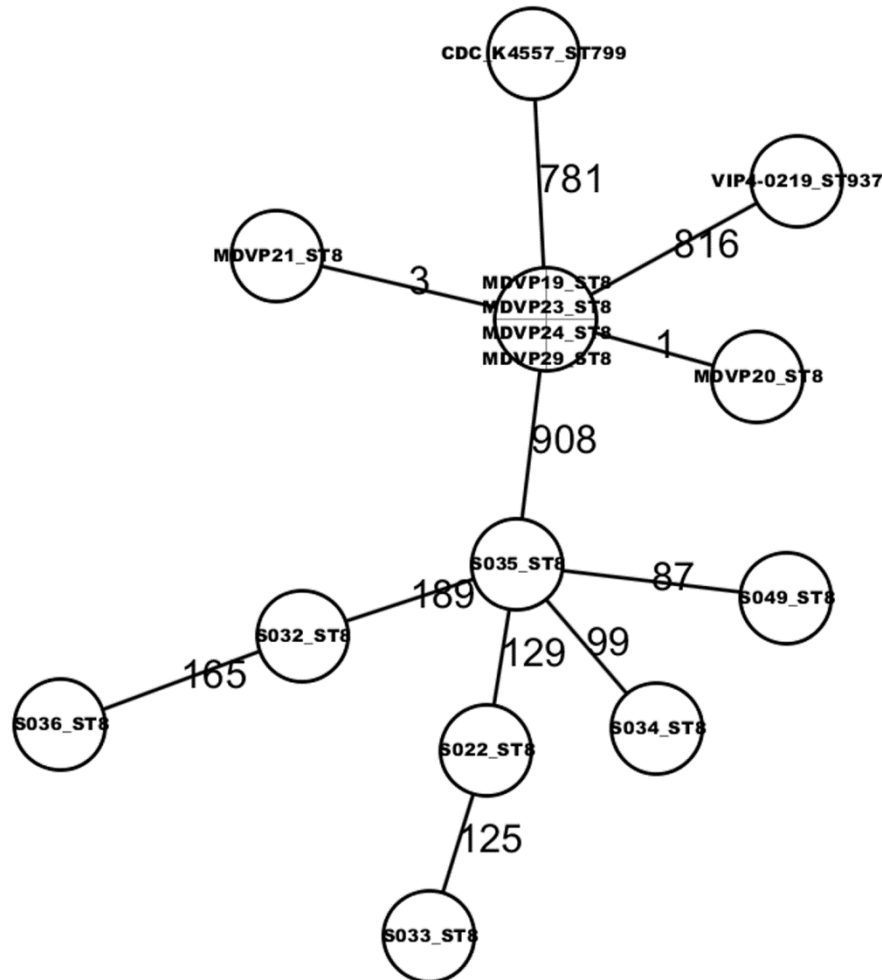

B)

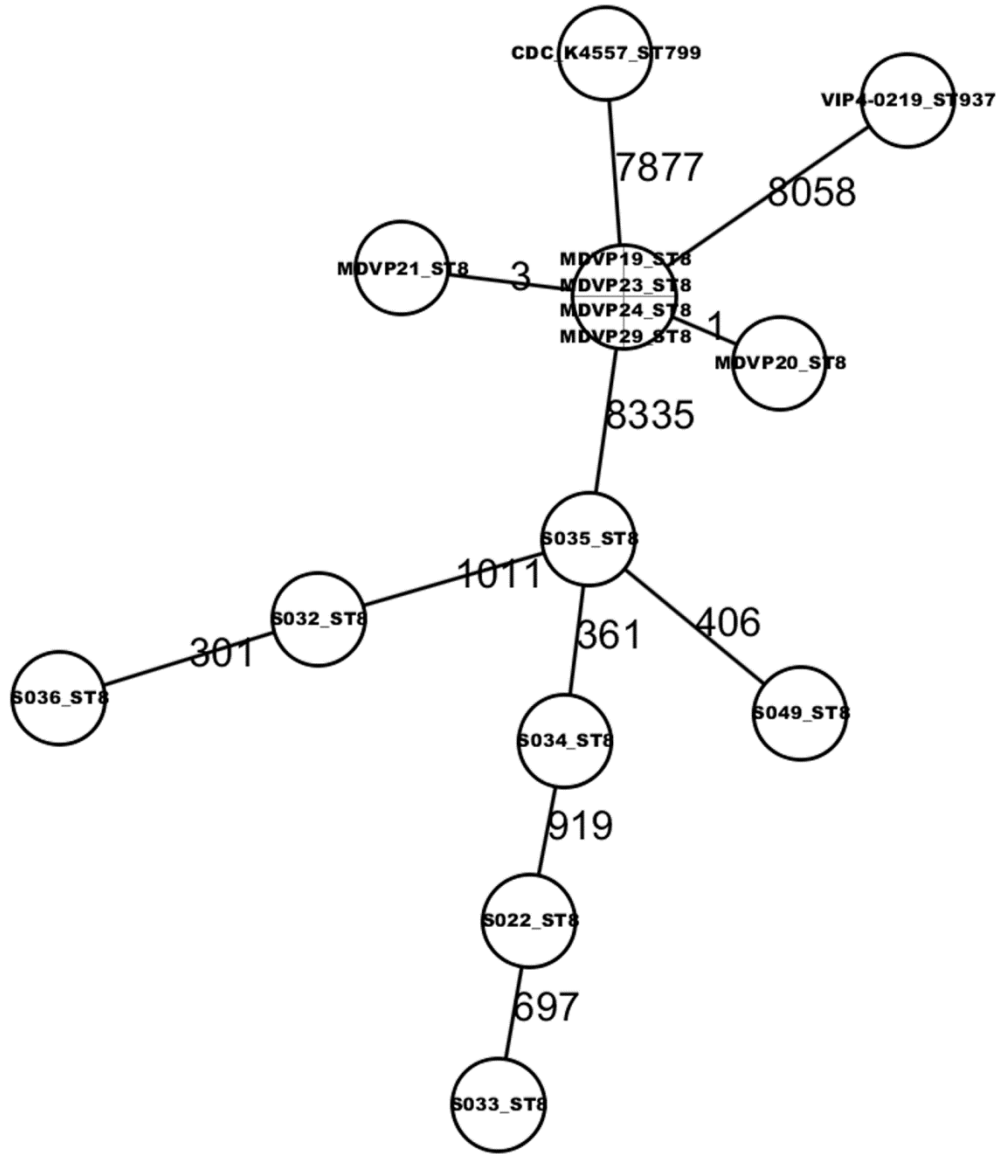

Supplement: AEM.00096-16_zam999117150so1.pdf [file AEM.00096-16_zam999117150so1.pdf]
